# Supplementary material
Source: PubMed Central journal article supplement (PMC2807181)
Supplement: NIHMS114999-supplement-Supp1.pdf [file NIHMS114999-supplement-Supp1.pdf]

## Supplemental Figure 1

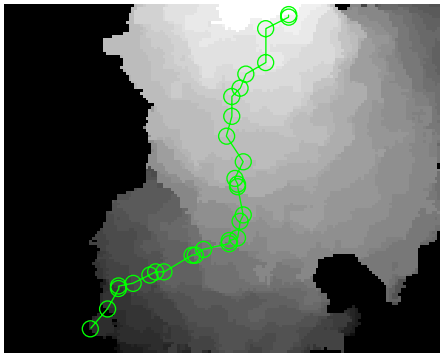

116  $\mu\text{m/s}$

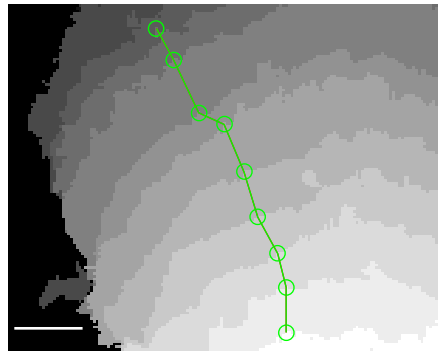

313  $\mu\text{m/s}$

### Supplemental Figure 1. Examples of images used to compute wave propagation speed

Equal shades of gray represent the wave boundary at a given time, with darker shades corresponding to later time points during the wave. The width of isotemporal regions is indicative of the distance traveled during the interval between frames (250 ms). The green line represents the path of the wave and green circles represent the points along the wave boundaries where the distance measurements are taken to determine velocity (see Methods). The wave on the left has an average velocity of 116  $\mu\text{m/sec}$  whereas the wave on the right has an average velocity of 313  $\mu\text{m/sec}$ . Scale bar 100 $\mu\text{m}$ .
