# Supplementary material
Source: PubMed Central journal article supplement (PMC2807181)
Supplement: NIHMS114999-supplement-Supp2.pdf [file NIHMS114999-supplement-Supp2.pdf]

Supplemental Figure 2

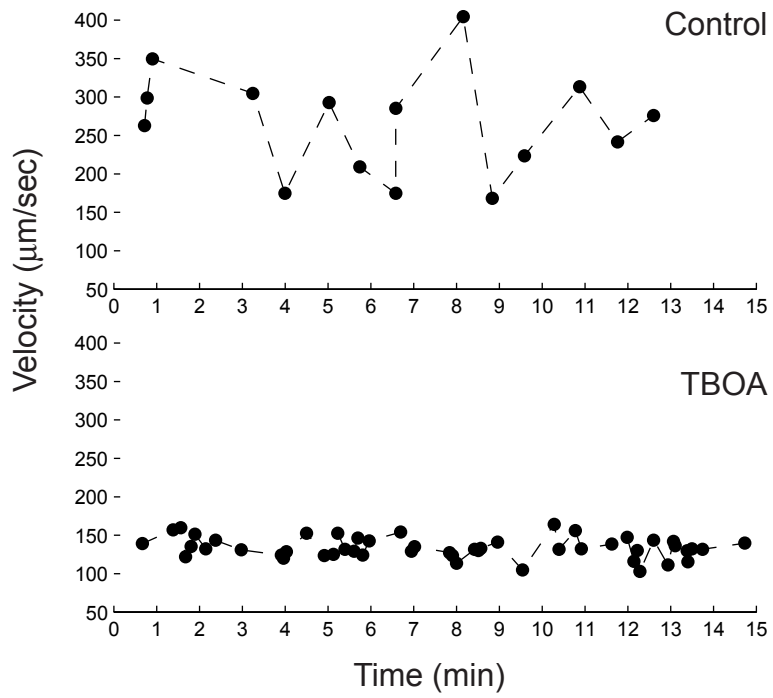

**Supplemental Figure 2. Blocking glutamate transporters decreases the variability of wave propagation speed**

Plots of propagation speed vs. time in a single retina. Each dot represents one wave. Top, control; bottom, TBOA.
