# Supplementary material
Source: PubMed Central journal article supplement (PMC2807181)
Supplement: NIHMS114999-supplement-Supp3.pdf [file NIHMS114999-supplement-Supp3.pdf]

### Supplemental Figure 3

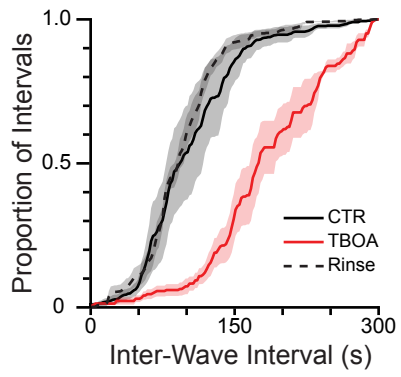

### Supplemental Figure 3. TBOA reduces wave frequency during Stage II waves

Cumulative histogram summarizing effect of TBOA on inter-wave intervals during Stage II waves. n=5 retinas, aged P5-P6. Black is control, red is 25 μM TBOA, dotted line is rinse.
