# Supplementary material
Source: PubMed Central journal article supplement (PMC2807181)
Supplement: NIHMS114999-supplement-Supp4.pdf [file NIHMS114999-supplement-Supp4.pdf]

## Supplemental Figure 4

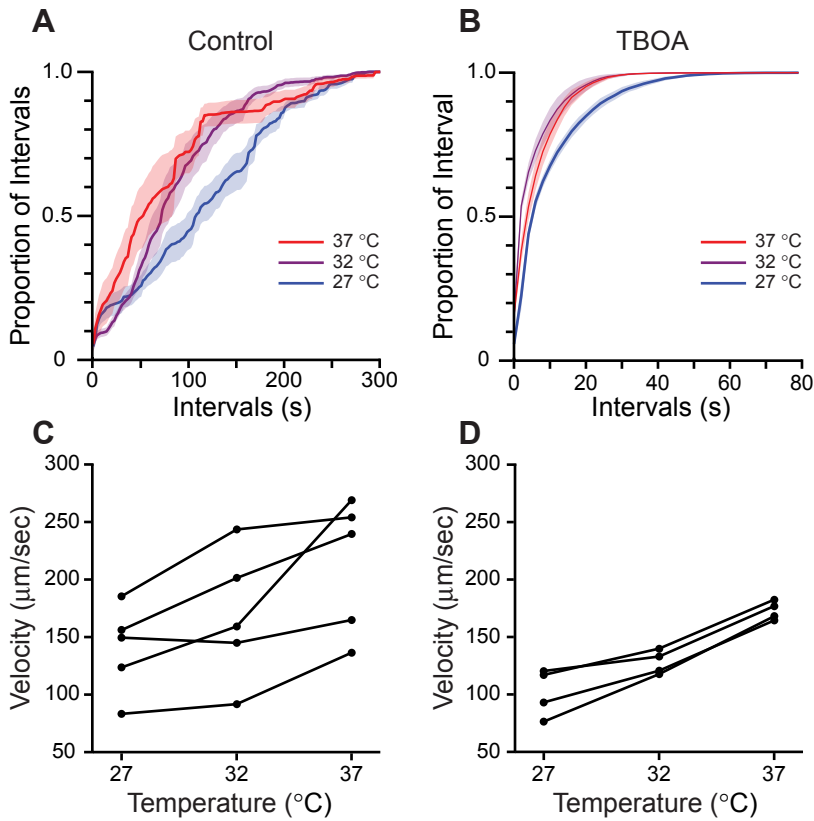

### Supplemental Figure 4: Temperature effects on spatiotemporal properties of Stage III waves

(a) Cumulative histogram summarizing effects of different bath temperatures on inter-wave intervals. Shaded areas represent standard error of the mean.

(b) Cumulative histogram summarizing effects of different bath temperatures on inter-wave intervals in the presence of TBOA.

(c) Effects of temperature on propagation speed. Individual dots represent single retinas; lines connect a retina's speed at three different temperatures.

(d) Effects of temperature on propagation speed in the presence of TBOA. Note there is a reduction in the across-retina variability in the presence of TBOA described in Figure 5. Since the effects of changing temperature on the spatiotemporal properties of waves follows the same trends in the presence of TBOA, we cannot differentiate effects of temperature on glutamate transporters from effects on other physiological processes.
